# Supplementary material for: Breast Cancer Care Pathways for Women with Preexisting Severe Mental Disorders: Evidence of Disparities in France?
Source: MDPI journal article supplement (doi:10.3390/jcm12020412), 2023-01-04
Supplement: s1 [file s1]

**Figure S1. Flowchart for the selection of the study population**

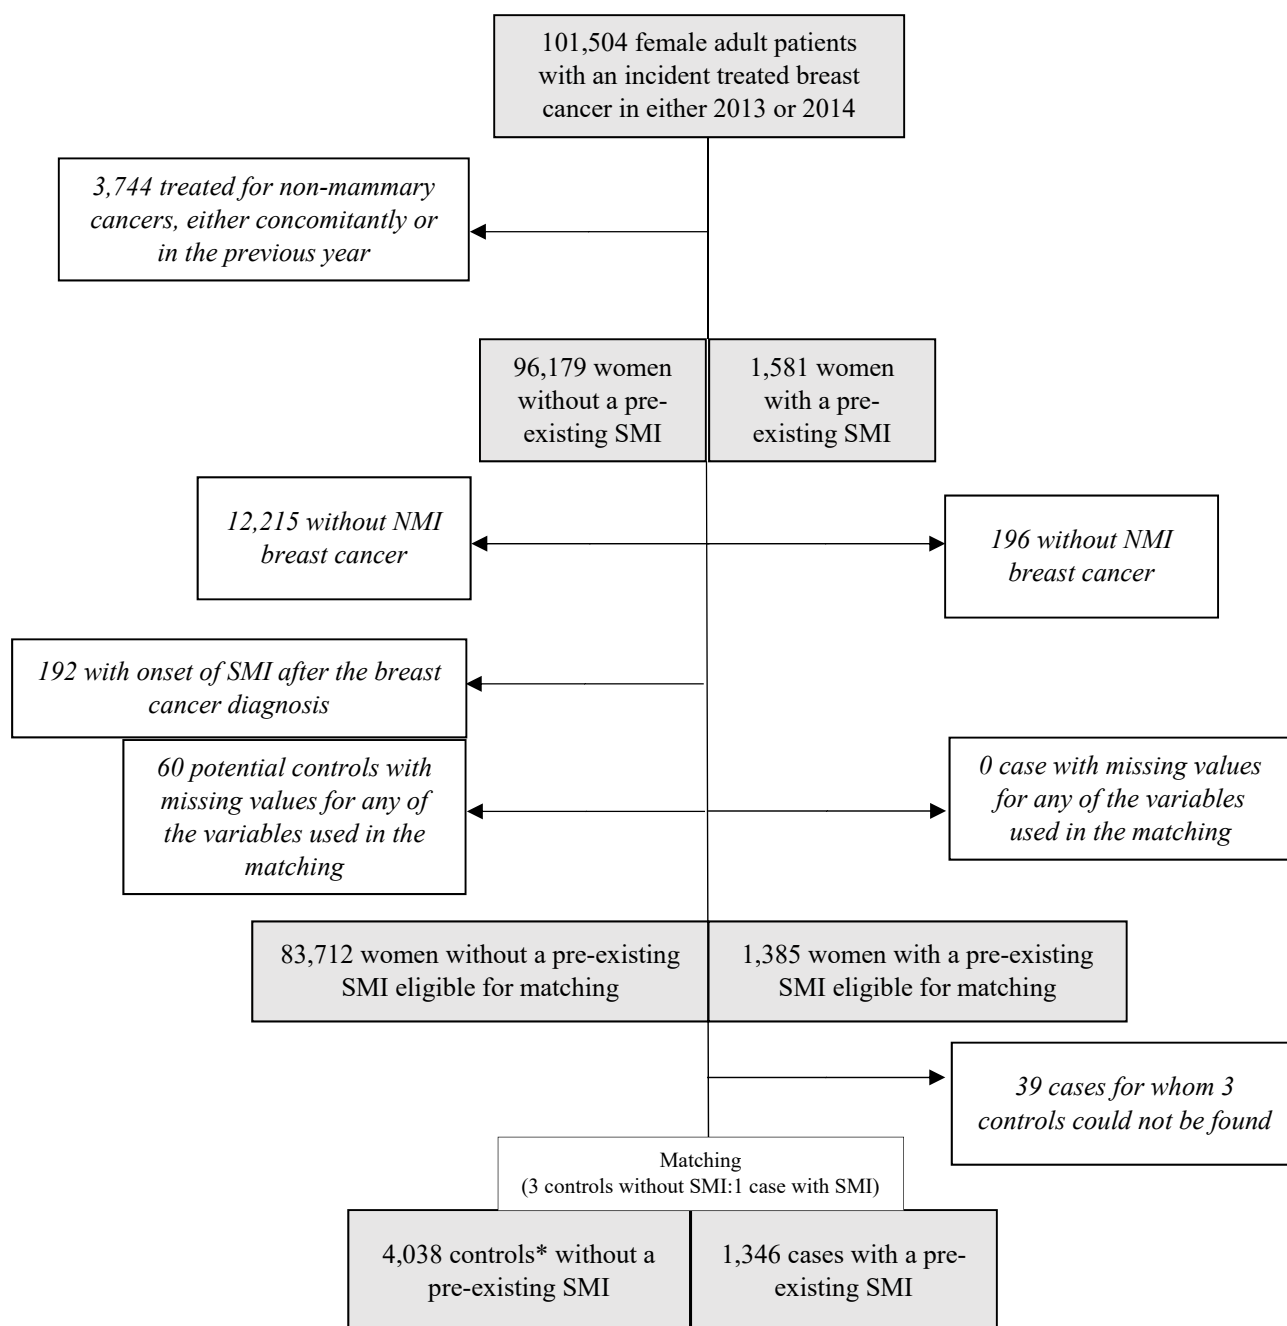

Note: \*4,000 individuals selected through matching with replacement (certain matched multiple times to obtain 4,038 controls)

Table S1. Characteristics of matched and unmatched SMI patients

|                                                                                                                 | Matched women with SMI<br>(n=1,346) | Unmatched women with SMI<br>(n=39) |
|-----------------------------------------------------------------------------------------------------------------|-------------------------------------|------------------------------------|
| Characteristic                                                                                                  | Mean ( $\pm$ SD) or n (%)           |                                    |
| <b>Demographics</b>                                                                                             |                                     |                                    |
| Age                                                                                                             | 61.08 ( $\pm$ 11.70)                | 53.82 ( $\pm$ 18.14)               |
| <b>Socio-economic characteristics at the individual level</b>                                                   |                                     |                                    |
| Inclusion in the scheme covering healthcare costs for low-income groups (CMU-C)                                 | 52 (3.86)                           | 5 (12.82)                          |
| Inclusion in the scheme providing financial assistance for the purchase of supplementary health insurance (ACS) | 155 (11.52)                         | 6 (15.38)                          |
| <b>Characteristics of the living environment</b>                                                                |                                     |                                    |
| Quintile of community-level deprivation index (FDep)- using bounds calculated at the national level             |                                     |                                    |
| 1st quintile (least deprived)                                                                                   | 249 (18.50)                         | 1 (2.56)                           |
| 2nd quintile                                                                                                    | 229 (17.01)                         | 4 (10.26)                          |
| 3rd quintile                                                                                                    | 333 (24.74)                         | 10 (25.64)                         |
| 4th quintile                                                                                                    | 263 (19.54)                         | 12 (30.77)                         |
| 5th quintile (most deprived)                                                                                    | 228 (16.94)                         | 9 (23.08)                          |
| <i>Missing values</i>                                                                                           | 44 (3.27)                           | 2 (5.13)                           |
| Residency in an overseas territory                                                                              | 23 (1.71)                           | 2 (5.13)                           |
| <b>Clinical characteristics</b>                                                                                 |                                     |                                    |
| Non-metastatic invasive breast cancer with lymph node involvement                                               | 263 (19.54)                         | 30 (76.92)                         |
| Non-metastatic invasive breast cancer with no lymph node involvement                                            | 1,083 (80.46)                       | 8 (20.51)                          |
| Comorbidity index                                                                                               | 0.58 ( $\pm$ 0.97)                  | 0.37 ( $\pm$ 0.67)                 |
